# Supplementary material for: SrTi(IO3)6·2H2O and SrSn(IO3)6: distinct arrangements of lone pair electrons leading to large birefringences
Source: Royal Society of Chemistry journal article supplement (doi:10.1039/d0ra10726c), 2021-01-01

## Electronic Supplementary Information

### **SrTi(IO<sub>3</sub>)<sub>6</sub>·2H<sub>2</sub>O and SrSn(IO<sub>3</sub>)<sub>6</sub>: Distinct Arrangements of Lone Pair Electrons Leading to Large Birefringences**

Kaitong Liu,<sup>a, b</sup> Jian Han,<sup>a, \*</sup> Junben Huang,<sup>a</sup> Zhonglei Wei,<sup>a, b</sup> Zhihua Yang,<sup>a</sup> and  
Shilie Pan<sup>a, \*</sup>

<sup>a</sup>CAS Key Laboratory of Functional Materials and Devices for Special Environments, Xinjiang  
Technical Institute of Physics & Chemistry, CAS; Xinjiang Key Laboratory of Electronic  
Information Materials and Devices, Urumqi 830011, China

<sup>b</sup>Center of Materials Science and Optoelectronics Engineering, University of Chinese Academy  
of Sciences, Beijing 100049, China

**Table S1.** Atomic coordinates ( $\times 10^4$ ), equivalent isotropic displacement parameters ( $\text{\AA}^2 \times 10^3$ ), and bond valence sum (BVS) for  $\text{SrTi}(\text{IO}_3)_6 \cdot 2\text{H}_2\text{O}$ ,  $(\text{H}_3\text{O})_2\text{Ti}(\text{IO}_3)_6$ , and  $\text{SrSn}(\text{IO}_3)_6$ , respectively.  $U_{\text{eq}}$  is defined as one-third of the trace of the orthogonalized  $U_{ij}$  tensor.

| Atoms                                                  | x       | y       | z        | $U_{\text{eq}}$ | BVS  |
|--------------------------------------------------------|---------|---------|----------|-----------------|------|
| $\text{SrTi}(\text{IO}_3)_6 \cdot 2\text{H}_2\text{O}$ |         |         |          |                 |      |
| Sr(1)                                                  | 0       | 0       | 10000    | 15(1)           | 2.23 |
| Ti(1)                                                  | 6667    | 3333    | 8333     | 10(1)           | 4.56 |
| I(1)                                                   | 3724(1) | 522(1)  | 9615(1)  | 12(1)           | 5.02 |
| O(1)                                                   | 0       | 0       | 8059(6)  | 93(3)           | 0.42 |
| O(2)                                                   | 5194(3) | 2177(3) | 9255(3)  | 20(1)           | 2.29 |
| O(3)                                                   | 2702(3) | 1249(3) | 9982(3)  | 22(1)           | 1.99 |
| O(4)                                                   | 4364(3) | 364(3)  | 10885(3) | 22(1)           | 1.73 |
| $(\text{H}_3\text{O})_2\text{Ti}(\text{IO}_3)_6$       |         |         |          |                 |      |
| Ti(1)                                                  | 10000   | 10000   | 0        | 22(1)           | 4.17 |
| I(1)                                                   | 6843(1) | 7379(1) | 1078(1)  | 16(1)           | 4.92 |
| O(1)                                                   | 3333    | 6667    | 249(9)   | 39(2)           | /    |
| O(2)                                                   | 8406(4) | 9094(4) | 1016(3)  | 26(1)           | 2.17 |
| O(3)                                                   | 6008(4) | 7876(4) | 2144(3)  | 19(1)           | 1.68 |
| O(4)                                                   | 6124(5) | 7587(4) | -273(3)  | 32(1)           | 1.75 |
| $\text{SrSn}(\text{IO}_3)_6$                           |         |         |          |                 |      |
| Sr(1)                                                  | 0       | 0       | 5000     | 14(1)           | 1.93 |
| Sn(1)                                                  | 0       | 0       | 0        | 8(1)            | 3.95 |
| I(1)                                                   | 2265(1) | 2664(1) | 2158(1)  | 8(1)            | 4.89 |
| O(1)                                                   | 2091(3) | 3853(3) | 1137(3)  | 12(1)           | 1.96 |
| O(2)                                                   | 614(3)  | 1968(3) | 3000(3)  | 14(1)           | 1.78 |
| O(3)                                                   | 1786(3) | 1215(3) | 1038(3)  | 11(1)           | 2.12 |

**Table S2.** Selected bond lengths (Å) and angles (deg.) for SrTi(IO<sub>3</sub>)<sub>6</sub>·2H<sub>2</sub>O, (H<sub>3</sub>O)<sub>2</sub>Ti(IO<sub>3</sub>)<sub>6</sub>, and SrSn(IO<sub>3</sub>)<sub>6</sub>, respectively.

| SrTi(IO <sub>3</sub> ) <sub>6</sub> ·2H <sub>2</sub> O |            |                     |            |
|--------------------------------------------------------|------------|---------------------|------------|
| Sr(1)-O(1)                                             | 2.433(8)   | Ti(1)-O(2)          | 1.915(3)   |
| Sr(1)-O(1)#1                                           | 2.433(8)   | Ti(1)-O(2)#8        | 1.915(3)   |
| Sr(1)-O(3)#2                                           | 2.664(3)   | Ti(1)-O(2)#9        | 1.915(3)   |
| Sr(1)-O(3)#3                                           | 2.664(3)   | Ti(1)-O(2)#10       | 1.915(3)   |
| Sr(1)-O(3)#1                                           | 2.664(3)   | I(1)-O(3)           | 1.790(3)   |
| Sr(1)-O(3)#4                                           | 2.664(3)   | I(1)-O(4)           | 1.797(3)   |
| Sr(1)-O(3)#5                                           | 2.664(3)   | I(1)-O(2)           | 1.843(3)   |
| Sr(1)-O(3)                                             | 2.664(3)   | O(1)-H(1)           | 0.8221     |
| Ti(1)-O(2)#6                                           | 1.915(3)   | O(1)-H(1)#5         | 0.82(13)   |
| Ti(1)-O(2)#7                                           | 1.915(3)   | O(1)-H(1)#3         | 0.82(13)   |
| O(1)-Sr(1)-O(1)#1                                      | 180        | O(3)#2-Sr(1)-O(3)   | 60.007(3)  |
| O(1)-Sr(1)-O(3)#2                                      | 90.49(7)   | O(3)#3-Sr(1)-O(3)   | 119.993(2) |
| O(1)#1-Sr(1)-O(3)#2                                    | 89.51(7)   | O(3)#1-Sr(1)-O(3)   | 180        |
| O(1)-Sr(1)-O(3)#3                                      | 89.51(7)   | O(3)#4-Sr(1)-O(3)   | 60.007(3)  |
| O(1)#1-Sr(1)-O(3)#3                                    | 90.49(7)   | O(3)#5-Sr(1)-O(3)   | 119.993(3) |
| O(3)#2-Sr(1)-O(3)#3                                    | 180.00(14) | O(2)#6-Ti(1)-O(2)#7 | 180        |
| O(1)-Sr(1)-O(3)#1                                      | 90.49(7)   | O(2)#6-Ti(1)-O(2)   | 92.64(14)  |
| O(1)#1-Sr(1)-O(3)#1                                    | 89.51(7)   | O(2)#7-Ti(1)-O(2)   | 87.36(14)  |
| O(3)#2-Sr(1)-O(3)#1                                    | 119.993(2) | O(2)#6-Ti(1)-O(2)#8 | 87.37(14)  |
| O(3)#3-Sr(1)-O(3)#1                                    | 60.007(3)  | O(2)#7-Ti(1)-O(2)#8 | 92.63(14)  |
| O(1)-Sr(1)-O(3)#4                                      | 90.49(7)   | O(2)-Ti(1)-O(2)#8   | 180.00(15) |

|                     |            |                      |            |
|---------------------|------------|----------------------|------------|
| O(1)#1-Sr(1)-O(3)#4 | 89.51(7)   | O(2)#6-Ti(1)-O(2)#9  | 92.64(14)  |
| O(3)#2-Sr(1)-O(3)#4 | 119.993(3) | O(2)#7-Ti(1)-O(2)#9  | 87.36(14)  |
| O(3)#3-Sr(1)-O(3)#4 | 60.007(3)  | O(2)-Ti(1)-O(2)#9    | 87.36(14)  |
| O(3)#1-Sr(1)-O(3)#4 | 119.993(3) | O(2)#8-Ti(1)-O(2)#9  | 92.64(14)  |
| O(1)-Sr(1)-O(3)#5   | 89.51(7)   | O(2)#6-Ti(1)-O(2)#10 | 87.36(14)  |
| O(1)#1-Sr(1)-O(3)#5 | 90.49(7)   | O(2)#7-Ti(1)-O(2)#10 | 92.63(14)  |
| O(3)#2-Sr(1)-O(3)#5 | 60.007(3)  | O(2)-Ti(1)-O(2)#10   | 92.64(14)  |
| O(3)#3-Sr(1)-O(3)#5 | 119.993(3) | O(2)#8-Ti(1)-O(2)#10 | 87.36(14)  |
| O(3)#1-Sr(1)-O(3)#5 | 60.007(3)  | O(2)#9-Ti(1)-O(2)#10 | 180        |
| O(3)#4-Sr(1)-O(3)#5 | 180.00(14) | O(3)-I(1)-O(4)       | 101.98(15) |
| O(1)-Sr(1)-O(3)     | 89.51(7)   | O(3)-I(1)-O(2)       | 93.30(13)  |
| O(1)#1-Sr(1)-O(3)   | 90.49(7)   | O(4)-I(1)-O(2)       | 96.48(14)  |

Symmetry transformations used to generate equivalent atoms:

#1 -x,-y,-z+2 #2 x-y,x,-z+2 #3 -x+y,-x,z #4 -y,x-y,z #5 y,-x+y,-z+2 #6 y+1/3,-x+y+2/3,-z+5/3

#7 -y+1,x-y,z #8 -x+y+1,-x+1,z #9 -x+4/3,-y+2/3,-z+5/3 #10 x-y+1/3,x-1/3,-z+5/3

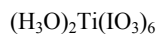

|                     |          |                     |          |
|---------------------|----------|---------------------|----------|
| Ti(1)-O(2)#1        | 1.946(5) | Ti(1)-O(2)          | 1.946(5) |
| Ti(1)-O(2)#2        | 1.946(5) | I(1)-O(3)           | 1.790(5) |
| Ti(1)-O(2)#3        | 1.946(5) | I(1)-O(4)           | 1.807(5) |
| Ti(1)-O(2)#4        | 1.946(5) | I(1)-O(2)           | 1.860(6) |
| Ti(1)-O(2)#5        | 1.946(5) |                     |          |
| O(2)#1-Ti(1)-O(2)#2 | 180      | O(2)#4-Ti(1)-O(2)#5 | 91.6(2)  |
| O(2)#1-Ti(1)-O(2)#3 | 88.4(2)  | O(2)#1-Ti(1)-O(2)   | 91.6(2)  |

|                     |         |                   |           |
|---------------------|---------|-------------------|-----------|
| O(2)#2-Ti(1)-O(2)#3 | 91.6(2) | O(2)#2-Ti(1)-O(2) | 88.4(2)   |
| O(2)#1-Ti(1)-O(2)#4 | 91.6(2) | O(2)#3-Ti(1)-O(2) | 91.6(2)   |
| O(2)#2-Ti(1)-O(2)#4 | 88.4(2) | O(2)#4-Ti(1)-O(2) | 88.4(2)   |
| O(2)#3-Ti(1)-O(2)#4 | 180     | O(2)#5-Ti(1)-O(2) | 180.0(2)  |
| O(2)#1-Ti(1)-O(2)#5 | 88.4(2) | O(3)-I(1)-O(4)    | 101.1(3)  |
| O(2)#2-Ti(1)-O(2)#5 | 91.6(2) | O(3)-I(1)-O(2)    | 94.21(17) |
| O(2)#3-Ti(1)-O(2)#5 | 88.4(2) | O(4)-I(1)-O(2)    | 94.99(18) |

Symmetry transformations used to generate equivalent atoms:

#1 y, -x+y+1, -z #2 -y+2, x-y+1, z #3 -x+2, -y+2, -z #4 x-y+1, x, -z #5 -x+y+1, -x+2, z

SrSn(IO<sub>3</sub>)<sub>6</sub>

|                     |           |                     |            |
|---------------------|-----------|---------------------|------------|
| Sr(1)-O(1)#1        | 2.704(3)  | Sr(1)-O(2)#11       | 2.912(3)   |
| Sr(1)-O(1)#2        | 2.704(3)  | Sn(1)-O(3)          | 2.059(3)   |
| Sr(1)-O(1)#3        | 2.704(3)  | Sn(1)-O(3)#12       | 2.059(3)   |
| Sr(1)-O(1)#4        | 2.704(3)  | Sn(1)-O(3)#13       | 2.059(3)   |
| Sr(1)-O(1)#5        | 2.704(3)  | Sn(1)-O(3)#8        | 2.059(3)   |
| Sr(1)-O(1)#6        | 2.704(3)  | Sn(1)-O(3)#14       | 2.059(3)   |
| Sr(1)-O(2)          | 2.912(3)  | Sn(1)-O(3)#10       | 2.059(3)   |
| Sr(1)-O(2)#7        | 2.912(3)  | I(1)-O(1)           | 1.792(3)   |
| Sr(1)-O(2)#8        | 2.912(3)  | I(1)-O(2)           | 1.811(3)   |
| Sr(1)-O(2)#9        | 2.912(3)  | I(1)-O(3)           | 1.859(3)   |
| Sr(1)-O(2)#10       | 2.912(3)  |                     |            |
| O(1)#1-Sr(1)-O(1)#2 | 180       | O(2)-Sr(1)-O(2)#9   | 111.81(10) |
| O(1)#1-Sr(1)-O(1)#3 | 115.42(4) | O(2)#7-Sr(1)-O(2)#9 | 68.19(10)  |
| O(1)#2-Sr(1)-O(1)#3 | 64.58(4)  | O(2)#8-Sr(1)-O(2)#9 | 111.81(10) |

|                     |            |                       |            |
|---------------------|------------|-----------------------|------------|
| O(1)#1-Sr(1)-O(1)#4 | 64.58(4)   | O(1)#1-Sr(1)-O(2)#10  | 113.47(9)  |
| O(1)#2-Sr(1)-O(1)#4 | 115.42(4)  | O(1)#2-Sr(1)-O(2)#10  | 66.53(9)   |
| O(1)#3-Sr(1)-O(1)#4 | 180        | O(1)#3-Sr(1)-O(2)#10  | 123.92(9)  |
| O(1)#1-Sr(1)-O(1)#5 | 115.41(4)  | O(1)#4-Sr(1)-O(2)#10  | 56.08(9)   |
| O(1)#2-Sr(1)-O(1)#5 | 64.59(4)   | O(1)#5-Sr(1)-O(2)#10  | 62.65(9)   |
| O(1)#3-Sr(1)-O(1)#5 | 115.41(4)  | O(1)#6-Sr(1)-O(2)#10  | 117.35(9)  |
| O(1)#4-Sr(1)-O(1)#5 | 64.59(4)   | O(2)-Sr(1)-O(2)#10    | 68.19(10)  |
| O(1)#1-Sr(1)-O(1)#6 | 64.59(4)   | O(2)#7-Sr(1)-O(2)#10  | 111.81(11) |
| O(1)#2-Sr(1)-O(1)#6 | 115.41(4)  | O(2)#8-Sr(1)-O(2)#10  | 68.19(10)  |
| O(1)#3-Sr(1)-O(1)#6 | 64.59(4)   | O(2)#9-Sr(1)-O(2)#10  | 180        |
| O(1)#4-Sr(1)-O(1)#6 | 115.41(4)  | O(1)#1-Sr(1)-O(2)#11  | 117.35(9)  |
| O(1)#5-Sr(1)-O(1)#6 | 180.00(12) | O(1)#2-Sr(1)-O(2)#11  | 62.65(9)   |
| O(1)#1-Sr(1)-O(2)   | 62.65(9)   | O(1)#3-Sr(1)-O(2)#11  | 66.53(9)   |
| O(1)#2-Sr(1)-O(2)   | 117.35(9)  | O(1)#4-Sr(1)-O(2)#11  | 113.47(9)  |
| O(1)#3-Sr(1)-O(2)   | 113.47(9)  | O(1)#5-Sr(1)-O(2)#11  | 56.08(9)   |
| O(1)#4-Sr(1)-O(2)   | 66.53(9)   | O(1)#6-Sr(1)-O(2)#11  | 123.92(9)  |
| O(1)#5-Sr(1)-O(2)   | 123.92(9)  | O(2)-Sr(1)-O(2)#11    | 180.00(14) |
| O(1)#6-Sr(1)-O(2)   | 56.08(9)   | O(2)#7-Sr(1)-O(2)#11  | 68.19(11)  |
| O(1)#1-Sr(1)-O(2)#7 | 56.08(9)   | O(2)#8-Sr(1)-O(2)#11  | 111.81(11) |
| O(1)#2-Sr(1)-O(2)#7 | 123.92(9)  | O(2)#9-Sr(1)-O(2)#11  | 68.19(10)  |
| O(1)#3-Sr(1)-O(2)#7 | 117.35(9)  | O(2)#10-Sr(1)-O(2)#11 | 111.81(10) |
| O(1)#4-Sr(1)-O(2)#7 | 62.65(9)   | O(3)-Sn(1)-O(3)#12    | 180        |
| O(1)#5-Sr(1)-O(2)#7 | 66.53(9)   | O(3)-Sn(1)-O(3)#13    | 88.22(12)  |
| O(1)#6-Sr(1)-O(2)#7 | 113.47(9)  | O(3)#12-Sn(1)-O(3)#13 | 91.78(12)  |
| O(2)-Sr(1)-O(2)#7   | 111.81(11) | O(3)-Sn(1)-O(3)#8     | 91.78(12)  |
| O(1)#1-Sr(1)-O(2)#8 | 123.92(9)  | O(3)#12-Sn(1)-O(3)#8  | 88.22(12)  |
| O(1)#2-Sr(1)-O(2)#8 | 56.08(9)   | O(3)#13-Sn(1)-O(3)#8  | 88.22(12)  |

|                     |           |                       |            |
|---------------------|-----------|-----------------------|------------|
| O(1)#3-Sr(1)-O(2)#8 | 62.65(9)  | O(3)-Sn(1)-O(3)#14    | 88.22(12)  |
| O(1)#4-Sr(1)-O(2)#8 | 117.35(9) | O(3)#12-Sn(1)-O(3)#14 | 91.78(12)  |
| O(1)#5-Sr(1)-O(2)#8 | 113.47(9) | O(3)#13-Sn(1)-O(3)#14 | 91.78(12)  |
| O(1)#6-Sr(1)-O(2)#8 | 66.53(9)  | O(3)#8-Sn(1)-O(3)#14  | 180.00(17) |
| O(2)-Sr(1)-O(2)#8   | 68.19(10) | O(3)-Sn(1)-O(3)#10    | 91.78(12)  |
| O(2)#7-Sr(1)-O(2)#8 | 180       | O(3)#12-Sn(1)-O(3)#10 | 88.22(12)  |
| O(1)#1-Sr(1)-O(2)#9 | 66.53(9)  | O(3)#13-Sn(1)-O(3)#10 | 180.0(2)   |
| O(1)#2-Sr(1)-O(2)#9 | 113.47(9) | O(3)#8-Sn(1)-O(3)#10  | 91.78(12)  |
| O(1)#3-Sr(1)-O(2)#9 | 56.08(9)  | O(3)#14-Sn(1)-O(3)#10 | 88.22(12)  |
| O(1)#4-Sr(1)-O(2)#9 | 123.92(9) | O(1)-I(1)-O(2)        | 100.91(15) |
| O(1)#5-Sr(1)-O(2)#9 | 117.35(9) | O(1)-I(1)-O(3)        | 95.52(14)  |
| O(1)#6-Sr(1)-O(2)#9 | 62.65(9)  | O(2)-I(1)-O(3)        | 101.18(14) |

Symmetry transformations used to generate equivalent atoms:

#1  $-x+1/3, -y+2/3, -z+2/3$  #2  $x-1/3, y-2/3, z+1/3$  #3  $y-2/3, -x+y-1/3, -z+2/3$  #4  $-y+2/3, x-y+1/3, z+1/3$

#5  $x-y+1/3, x-1/3, -z+2/3$  #6  $-x+y-1/3, -x+1/3, z+1/3$  #7  $y, -x+y, -z+1$  #8  $-y, x-y, z$  #9  $x-y, x, -z+1$

#10  $-x+y, -x, z$  #11  $-x, -y, -z+1$  #12  $-x, -y, -z$  #13  $x-y, x, -z$  #14  $y, -x+y, -z$  #15  $x+1/3, y+2/3, z-1/3$

---

**Figure S1.** Ball and stick structures of  $(\text{H}_3\text{O})_2\text{Ti}(\text{IO}_3)_6$ . (a) The basic building unit  $[\text{Ti}(\text{IO}_3)_6]^{2-}$ . (b) The  $[\text{H}_3\text{O}]^+$  molecule. (c) The two  $[\text{Ti}(\text{IO}_3)_6]^{2-}$  units separated by two

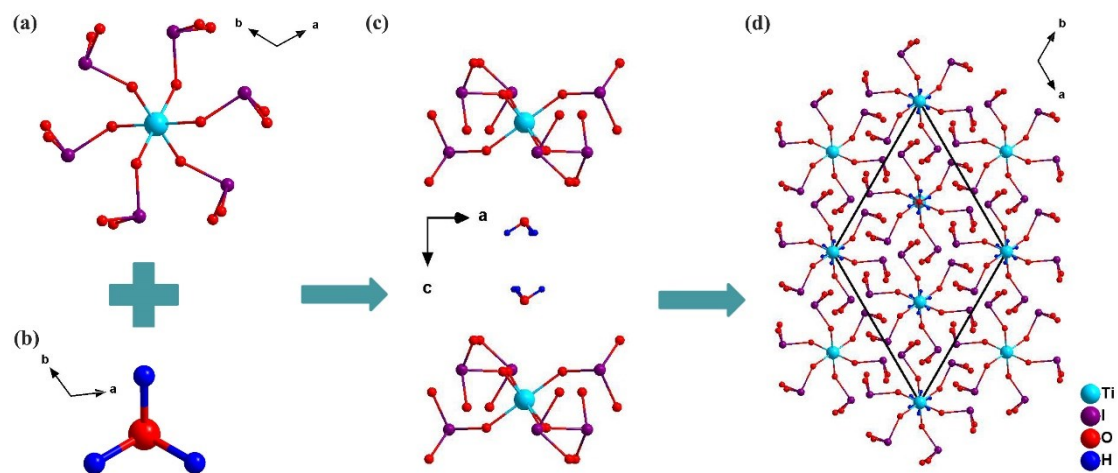

$[\text{H}_3\text{O}]^+$  molecules. (d) The final zero-dimensional structure of  $(\text{H}_3\text{O})_2\text{Ti}(\text{IO}_3)_6$ .



**Figure S2.** Ball and stick structures of  $\text{SrSn}(\text{IO}_3)_6$ . (a) The basic building unit  $[\text{Sn}(\text{IO}_3)_6]^{2-}$ . (b) The  $\text{Sr}^{2+}$  cation. (c) The two  $[\text{Sn}(\text{IO}_3)_6]^{2-}$  units separated by one  $\text{Sr}^{2+}$

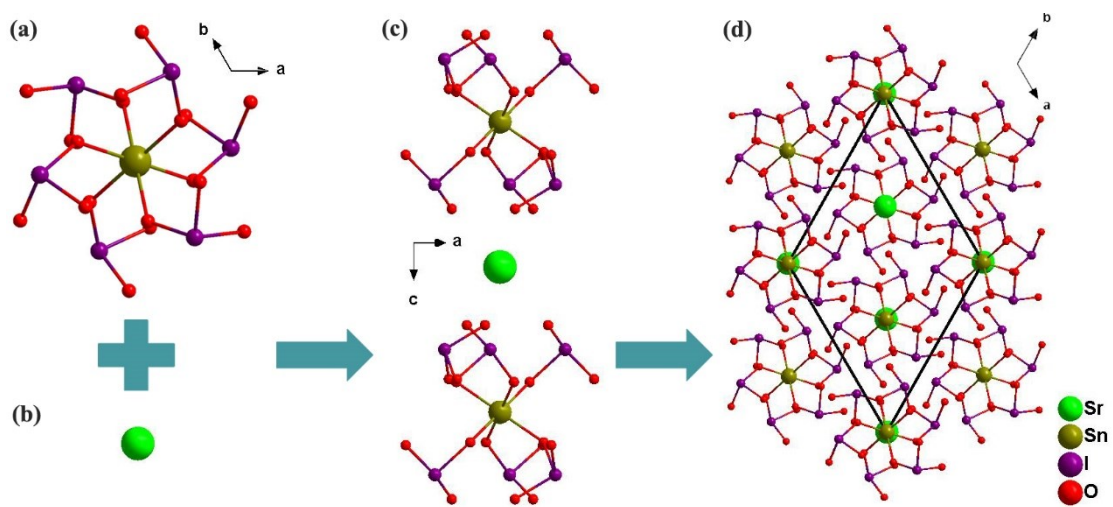

cation. (d) The final zero-dimensional structure of  $\text{SrSn}(\text{IO}_3)_6$ .

**Figure S3.** Distance and middle atoms of adjacent  $[M(\text{IO}_3)_6]^{2-}$  ( $M=\text{Ti}, \text{Sn}$ ) group in (a)  $\text{SrTi}(\text{IO}_3)_6 \cdot 2\text{H}_2\text{O}$ , (b)  $(\text{H}_3\text{O})_2\text{Ti}(\text{IO}_3)_6$ , and (c)  $\text{SrSn}(\text{IO}_3)_6$ , respectively.

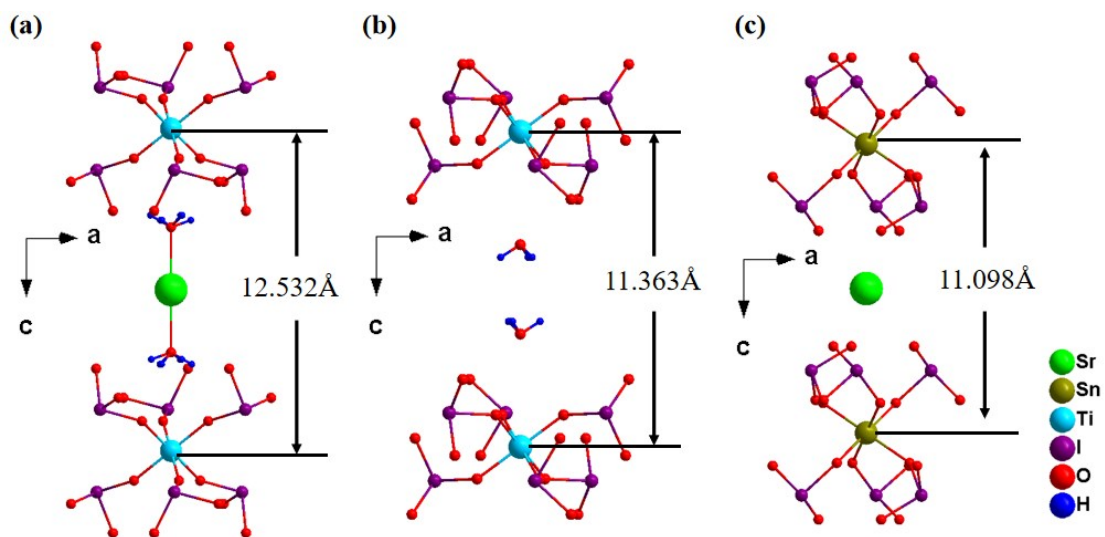

**Figure S4.** (a) The  $[\text{SrO}_8]^{14-}$  hexagonal bipyramid in  $\text{SrTi}(\text{IO}_3)_6 \cdot 2\text{H}_2\text{O}$ ; (b) The bipyramid with vertex Sr in  $\text{SrSn}(\text{IO}_3)_6$ .

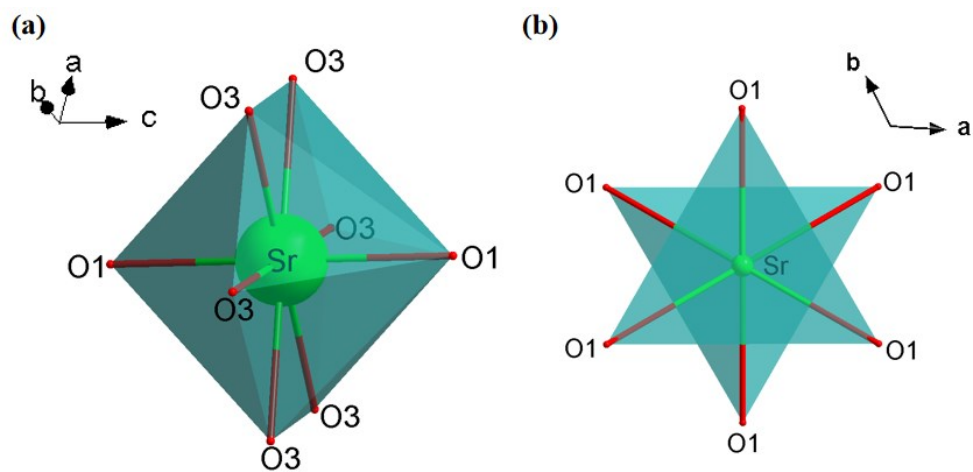

**Figure S5.** IR and Raman spectra of (a)  $\text{SrTi}(\text{IO}_3)_6 \cdot 2\text{H}_2\text{O}$ , (b)  $(\text{H}_3\text{O})_2\text{Ti}(\text{IO}_3)_6$ , and (c)  $\text{SrSn}(\text{IO}_3)_6$ , respectively.

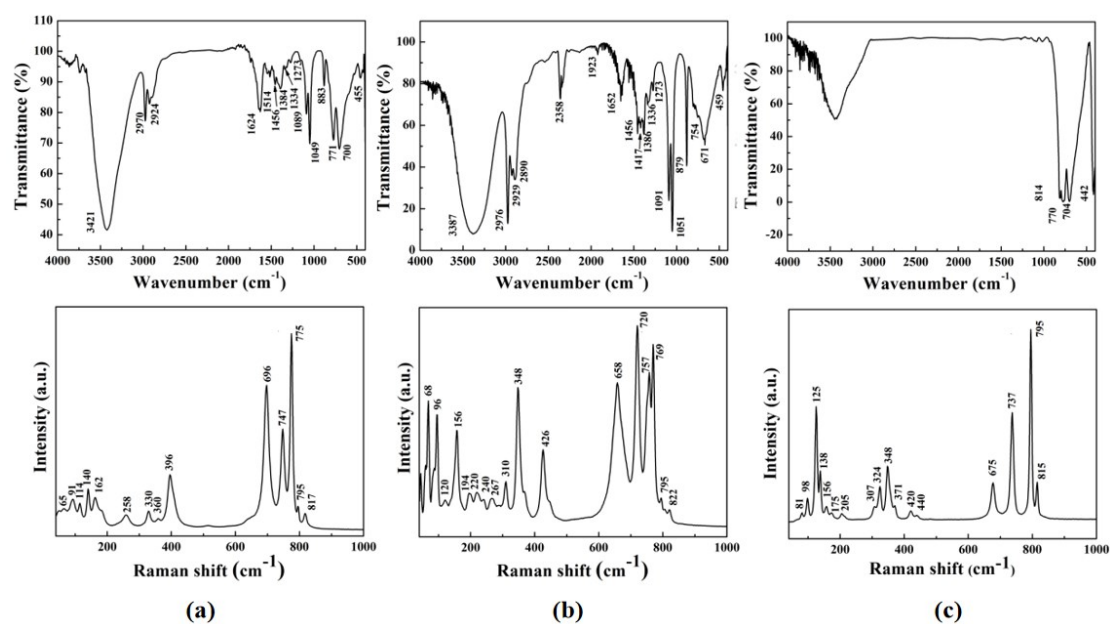

**Table S3.** Observed positions of the Raman bands ( $\text{cm}^{-1}$ ), and proposed assignment.

| $\text{SrTi}(\text{IO}_3)_6 \cdot 2\text{H}_2\text{O}$ | $(\text{H}_3\text{O})_2\text{Ti}(\text{IO}_3)_6$ | $\text{SrSn}(\text{IO}_3)_6$    | Proposed assignments                   |
|--------------------------------------------------------|--------------------------------------------------|---------------------------------|----------------------------------------|
| 817, 795                                               | 822, 795                                         | 815                             | combination                            |
| 775                                                    | 769, 757                                         | 795                             | Antisymmetric stretching of I-O groups |
| 747                                                    | 769, 757                                         | 737                             | Symmetric stretching of I-O groups     |
| 696, 396                                               | 658, 426                                         | 675, 440, 420                   | Ti/Sn-O stretching mode                |
| 360, 330                                               | 348, 310                                         | 371, 348, 324, 307              | torsional modes of $\text{Ti/Sn-O}_3$  |
| 258, 162, 140, 114, 91, 65                             | 267, 240, 220, 194, 156, 120, 96, 68             | 205, 175, 156, 138, 125, 98, 81 | Ti/Sn-O bending vibration              |

**Figure S6.** The TG-DSC curves of (a)  $\text{SrTi}(\text{IO}_3)_6 \cdot 2\text{H}_2\text{O}$ , (b)  $(\text{H}_3\text{O})_2\text{Ti}(\text{IO}_3)_6$ , and (c)  $\text{SrSn}(\text{IO}_3)_6$ , respectively.

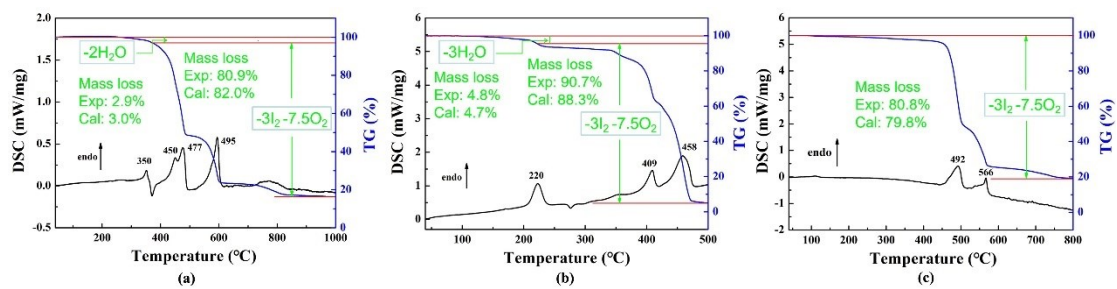

**Figure S7.** Room temperature magnetization plots of  $\text{SrTi}(\text{IO}_3)_6 \cdot 2\text{H}_2\text{O}$ ,  $(\text{H}_3\text{O})_2\text{Ti}(\text{IO}_3)_6$ , and  $\text{SrSn}(\text{IO}_3)_6$ , respectively.

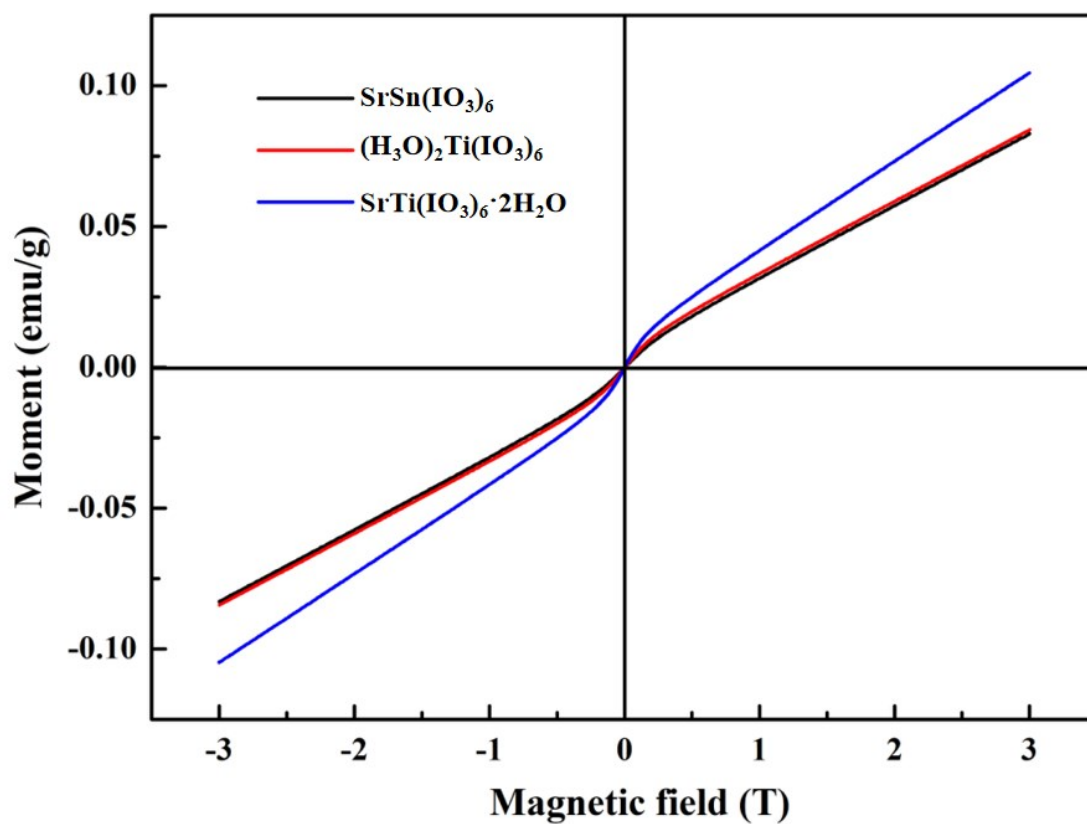

**Figure S8.** (a) The calculated birefringences of  $\text{SrTi}(\text{IO}_3)_6 \cdot 2\text{H}_2\text{O}$ ,  $(\text{H}_3\text{O})_2\text{Ti}(\text{IO}_3)_6$ , and  $\text{SrSn}(\text{IO}_3)_6$ ; the contributions for birefringence of each functional groups at the static limit derived from the cut-TiO group wave functions and cut-IO group wave functions of  $\text{SrTi}(\text{IO}_3)_6 \cdot 2\text{H}_2\text{O}$  (b) and  $(\text{H}_3\text{O})_2\text{Ti}(\text{IO}_3)_6$  (c).

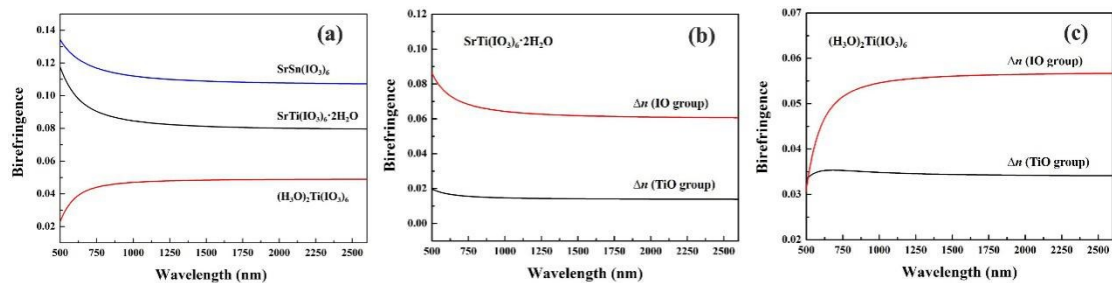

**Figure S9.** The arrangements diagrammatic drawing of Lone Pair Electrons of (a)  $\text{SrTi}(\text{IO}_3)_6 \cdot 2\text{H}_2\text{O}$ , (b)  $(\text{H}_3\text{O})_2\text{Ti}(\text{IO}_3)_6$ , and (c)  $\text{SrSn}(\text{IO}_3)_6$ , respectively.

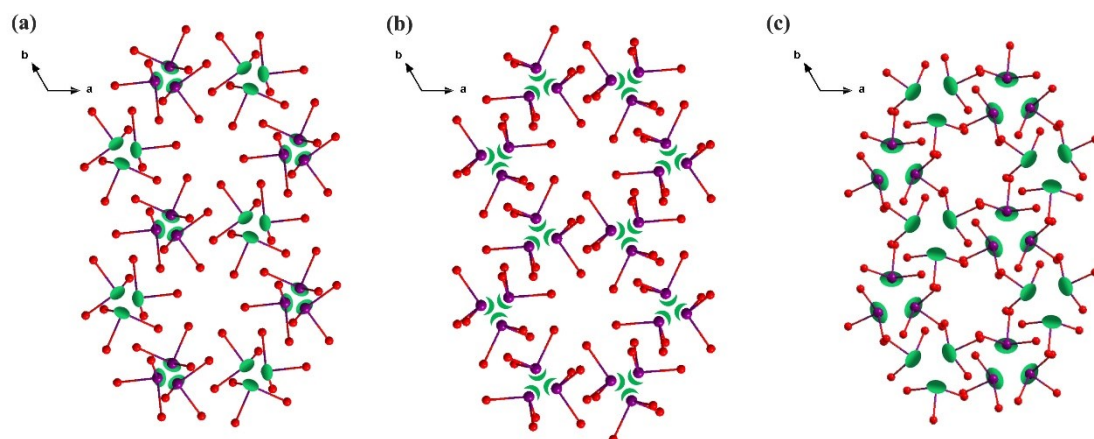

Supplement: d0ra10726c1.pdf [file d0ra10726c1.pdf]
